# **Long-Term Outcomes of Pediatric Graves Disease Patients Treated with Anti-Thyroid Drugs: Experience from a Taiwan Medical Center**

## **Short title**

Long-term outcomes in children and adolescents with Graves disease

Ya-Ting Chiang<sup>1,2¶</sup>, Wei-Hsin Ting<sup>1,3,4¶</sup>, Chi-Yu Huang<sup>1,3</sup>, Shih-Kang Huang<sup>1</sup>,

Chon-In Chan<sup>1</sup>, Bi-Wen Cheng<sup>5</sup>, Chao-Hsu Lin<sup>5</sup>, Yi-Lei Wu<sup>6</sup>, Chen-Mei Hung<sup>7</sup>,

Hsin-Jung Li<sup>8</sup>, Chia-Jung Chan<sup>9</sup>, Yann-Jinn Lee<sup>1,3,10,11,12\*</sup>

<sup>1</sup>Department of Pediatric Endocrinology, MacKay Children's Hospital, Taipei,  
Taiwan

<sup>2</sup>Department of Pediatric Endocrinology, Ditmanson Medical Foundation Chia-Yi  
Christian Hospital, Chiayi, Taiwan

<sup>3</sup>Department of Medicine, MacKay Medical College, New Taipei City, Taiwan

<sup>4</sup> MacKay Junior college of Medicine, Nursing and Management, New Taipei City,  
Taiwan

<sup>5</sup> Department of Pediatrics, MacKay Memorial Hospital HsinChu, Hsin-Chu, Taiwan

<sup>6</sup> Department of Pediatrics, Changhua Christian Hospital, Chang-Hua, Taiwan

<sup>7</sup> Department of Pediatrics, Hsinchu Cathay General Hospital, Hsin-Chu, Taiwan

<sup>8</sup> Department of Pediatrics, St. Martin De Porres Hospital, Chiayi, Taiwan

<sup>9</sup> Chiahung Clinic, Taichung, Taiwan

<sup>10</sup> Department of Medical Research, MacKay Memorial Hospital Tamsui, New Taipei  
City, Taiwan

<sup>11</sup> Department of Pediatrics, School of Medicine, College of Medicine, Taipei  
Medical University, Taipei, Taiwan

<sup>12</sup>Institute of Biomedical Sciences, MacKay Medical College, New Taipei City,  
Taiwan

\*Corresponding author

E-mail: [yannlee@mmh.org.tw](mailto:yannlee@mmh.org.tw) (Lee YJ)

¶ These authors contributed equally to this work

## 1 **Abstract**

2 Graves disease (GD) is the most common cause of thyrotoxicosis in children and  
3 adolescents, accounting for 15% of all thyroid diseases during childhood.  
4 Anti-thyroid drugs (ATD) are recommended as the first-line treatment in children and  
5 adolescents. However, the remission rate is lower in children than in adults, and the  
6 optimal treatment duration and favorite factors associated with remission remain  
7 unknown. We aimed to investigate long-term outcomes of pediatric GD patients  
8 receiving ATD. We retrospectively reviewed medical charts of 300 pediatric GD  
9 subjects, who were initially treated with ATD and followed up for more than one year,  
10 from 1985 to 2017 at MacKay Children's Hospital. The 300 patients comprised 257  
11 (85.7%) females and 43 (14.3%) males, median age at diagnosis was 11.6 (range  
12 2.7-17.8) years, and median follow-up period was 4.7 (range 1.1-23.9) years. Overall,  
13 122 patients achieved the criteria for discontinuing ATD treatment, seventy-nine  
14 (39.9%) patients achieved remission, with a median follow-up period of 5.3 (range  
15 1.5-20.1) years. Patients in the remission group were more likely to be aged < 5 years  
16 (remission vs. relapse vs. ongoing ATD; 11.4 vs. 0 vs. 2.6%,  $P=0.02$ ), less likely to  
17 have a family history of thyroid disease (24.1 vs. 42.1 vs. 52.6 %,  $P=0.001$ ), and had

- 18 lower TRAb levels (42.8 vs. 53.6 vs. 65.1 %,  $P=0.02$ ). *Conclusion:* Long-term ATD
- 19 remains an effective treatment option for GD in children and adolescents. Pediatric
- 20 GD patients aged < 5 years, having no family history of thyroid disease and having
- 21 lower TRAb levels were more likely to achieve remission.

## 22 **Introduction**

23 Graves disease (GD) is a common disorder in adults, with a prevalence of  
24 approximately 0.5-1%. Pediatric patients account for < 5% of the total number of GD  
25 patients [1]. However, GD remains the most frequent cause of thyrotoxicosis in  
26 children and adolescents, accounting for 15% of thyroid disease during childhood [2].  
27 The incidence increases gradually from young children and peaks in adolescents [3].  
28 The optimal treatment option for GD in children and adolescents remains  
29 controversial. Current treatment approaches for GD include anti-thyroid drugs (ATD),  
30 radioactive iodine and surgery. ATD is usually recommended as the first-line  
31 treatment for GD in children and adolescents. However, the remission rate is lower in  
32 children than in adults [2, 4, 5]; the optimal treatment duration and the favorite factors  
33 associated with remission have not yet been established in children and adolescents  
34 [6-8].

35 The issue of how long ATD should be used in pediatric GD is important and  
36 warrants further study [5, 9]. In adult GD patients, if remission does not occur after  
37 12-18 months of ATD therapy, the chance of remission with prolonged therapy is  
38 very low [4, 10]. In the pediatric population, longer treatment duration is associated

39 with a higher remission rate. Lipple reported that the median time to remission with  
40 ATD was 4.3 years, and the expected remission rate was 25% every 2 years [11].  
41 Leger reported that overall estimated remission rates after withdrawing ATD  
42 increased with time and were 20, 37, 45, and 49% after 4, 6, 8, and 10 years follow-up,  
43 respectively [6]. A retrospective study in Japan revealed that the remission rate was  
44 46.2% after a median duration of 3.8 years [12]. However, long-term remission rate of  
45 pediatric GD cases treated with ATD was very low (< 20%), in cohorts from Australia  
46 [13] and Denmark [14].

47 Pediatric GD patients with some clinical or laboratory characteristics may have a  
48 higher chance of remission. A prospective study in France revealed that younger (age  
49 < 5 years), non-Caucasian children with severe initial presentation had a higher  
50 chance of relapse and required longer ATD treatment [7]. Another prospective study  
51 reported that initial less severe hyperthyroidism and the presence of other  
52 autoimmune conditions were remission predictors [6]. A similar study in the USA  
53 demonstrated that lower total T3, euthyroidism within 3 months of PTU and older age  
54 (age > 14.6 years) were significant remission predictors [8]; however, the largest  
55 retrospective study to date did not identify any significant factors to predict remission

56 [12]. These above studies showed no consistent findings and few studies were  
57 conducted in the Asian population.

58 We aimed to investigate the long-term outcomes of pediatric GD patients who  
59 received ATD and identify probable clinical or laboratory factors associated with  
60 remission. We documented our 32-year experience in 300 children and adolescents  
61 with GD. Patients were classified as remission, relapse, and ongoing ATD groups;  
62 clinical and laboratory characteristics were presented and analyzed.

## 63 **Material and methods**

64 We retrospectively reviewed medical charts of 396 GD subjects from 1985 to 2017 at  
65 MacKay Children's Hospital. All the patients were diagnosed before 18 years of age.  
66 GD was diagnosed based on clinical and laboratory evidence, including thyrotoxicosis,  
67 diffuse goiter, with or without ophthalmopathy, elevated free T4/total T4 and  
68 suppressed TSH levels, and presence of autoantibodies against TSH receptor [4, 15].  
69 Seventy-one patients were followed for less than one year, 6 patients received  
70 radioactive therapy and 19 patients received surgery as definite therapy and thus were  
71 excluded from our analyses. The remaining 300 patients initially treated with ATD  
72 and followed up for > 1 year constituted our study population.

73 We collected the following information from patients' medical charts: age at  
74 diagnosis, sex, height, weight, body mass index (BMI), pubertal status, family history  
75 of thyroid disease (including autoimmune thyroid disease, goiter, thyroid nodule and  
76 thyroid cancer) in third-degree relatives, personal history of other autoimmune disease  
77 (type 1 diabetes, myasthenia gravis) or other syndrome (Down syndrome), initial free  
78 T4 (fT4), TSH receptor antibody (TRAb) levels, and interval until fT4, TRAb level  
79 normalized. All patients were initially treated with carbimazole or methimazole, with



80 a starting dose between 2.5 and 30 mg/day, (0.05-0.80 mg/kg/day) depending on the  
81 patients' age, body weight, clinical severity, and initial fT4 levels. PTU was only used  
82 when the patients could not tolerate the side effect of carbimazole or methimazole.  
83 The dose was subsequently titrated and adjusted to maintain euthyroidism. Patients  
84 were initially followed at 2-4 weeks interval and then every 3 months after thyroid  
85 function test results normalized. ATD was discontinued if euthyroidism was  
86 maintained at a low dose (methimazole  $\leq$  2.5 mg/day) for more than 6-12 months, and  
87 the TRAb was near or within the normal range. Remission was defined as the  
88 maintenance of euthyroidism  $\geq$  12 months after ATD was discontinued and no  
89 recurrence of thyrotoxicosis was recorded during the follow-up period. Relapse was  
90 defined as an elevated fT4, suppressed TSH levels together with restarting ATD use.

91 We obtained informed written consent from the parents or guardians of the  
92 children, and the study was approved by Mackay Memorial Hospital institutional  
93 review board (18MMHIS156e).

## 94 **Statistical analysis**

95 We preformed descriptive statistics with categorical variables expressed as  
96 percentages and continuous variables as medians (25-75 percentiles) or means  $\pm$  SD.

97 *Univariate analysis.* A comparison of frequencies was performed employing the  
98 chi-square test or Fisher's exact test (in case of expected frequencies < 5). A  
99 comparison of continuous variables was carried out using One-way ANNOVA or  
100 Kruskal-Wallis test while multiple groups were compared.

101 **Multivariate analysis.** Multivariate logistic regression model was used to identify the  
102 possible remission predictors. Variables that were associated with remission in the  
103 univariate analysis and those judged to be potentially clinically relevant were entered  
104 the model. The variables used in the analysis were the proportion of young patients  
105 (age < 5 years), the proportion of patients with negative family history, initial FT4  
106 levels, and TRAb levels at diagnosis. All the statistical analyses were performed using  
107 SAS software (version 9.4).

## 108 **Results**

109 The 300 patients comprised 257 (85.7%) females and 43 (14.3%) males. Their median  
110 age at diagnosis was 11.6 (range 2.7-17.8), and 11 patients (3.7%) were diagnosed  
111 before the 5 years of age. The age and sex distributions were shown in Fig 1. One  
112 hundred and twelve patients (37.3%) reported a family history of thyroid disease. The  
113 median follow-up period of these patients was 4.7 (range 1.1-23.9) years. There were  
114 102 patients (34%) who were lost follow-up during the study period. Those who were  
115 lost follow-up had no significant differences in the clinical and laboratory  
116 characteristics compared with those who remained in the study, except for shorter  
117 follow-up period (3.7 vs. 5.3 years,  $P=0.004$ ).

118

119 **Fig 1. Age and sex distribution of children and adolescents with Graves disease**  
120 **(GD) diagnosis.**

121 The 300 patients consisted of 257 females and 43 males. The median age at diagnosis  
122 was 11.6 years (range 2.7–17.8 years). The incidence of GD increased markedly  
123 during adolescence.

124

125 From 198 patients who continued ATD treatment, ATD treatment was  
126 subsequently ongoing in 76 (38.4%) and was categorized as ongoing ATD treatment  
127 group. ATD was discontinued in 122 (61.6%) patients who met the criteria for  
128 discontinuing ATD treatment. Seventy-nine (39.9%) patients met the remission  
129 criteria, with a median follow-up of 5.3 (range 1.5-20.1) years and were classified as  
130 the remission group. Thirty-eight (19.2%) patients relapsed after ATD was  
131 discontinued, with a median of 0.7 (range 0.08-5.2) years and were assigned to the  
132 relapse group. The clinical course of the study population was shown in Fig 2.

133

134 **Fig 2. Clinical course of the study population initially treated with anti-thyroid**  
135 **drug (ATD).**

136 Of the 396 GD patients, 71 were followed for <1 year, 25 received definite therapy,  
137 and were excluded from our analyses. Of the remaining 300 patients, 102 patients  
138 were lost to follow-up during the study period. Of the 198 who continued ATD  
139 treatment, ATD treatment was subsequently ongoing in 76 (38.4%) and was  
140 discontinued in 122 (61.6%) patients who met the criteria of discontinuing ATD. Of  
141 the 122 patients who discontinued ATD treatment, 79 (39.9%) achieved a remission,

142 38 (19.2%) experienced a relapse, and 5 (2.5%) were lost to follow-up.

143

144 Patients in the remission group were more likely to be aged < 5 years (remission  
145 vs. relapse vs. ongoing ATD; 11.4 vs. 0 vs. 2.6%,  $P=0.02$ ), less likely to have a  
146 family history of thyroid disease (24.1 vs. 42.1 vs. 52.6%,  $P=0.001$ ), and had lower  
147 TRAb levels (42.8 vs. 53.6 vs. 65.1 %,  $P=0.02$ ), (Table 1). In the remission group,  
148 patients aged < 5 years tended to receive ATD for a longer period than those with  
149 older age (younger vs. older age group: 7.2 vs. 5.0 years,  $P=0.28$ ). The other variables,  
150 including male proportion, the proportion of puberty, height, weight and BMI z score,  
151 the proportion of patients with other diseases, initial ATD dose, initial serum fT4, and  
152 the interval until fT4 and TRAb levels became normal did not show any significant  
153 differences across the three groups.

154 **Table 1.** Clinical and Biochemical Characteristics of Four Groups: Remission Group, Relapse Group, and Ongoing Anti-Thyroid Drug  
 155 Treatment Group

| parameters                                  | N          | Remission Group,<br>N = 79 | Relapse group,<br>N = 38 | Ongoing ATD treatment group,<br>N = 76 | P-value       |
|---------------------------------------------|------------|----------------------------|--------------------------|----------------------------------------|---------------|
| Age at diagnosis (years)                    | 193        | 11.7 (8.5-13.6)            | 11.0 (9.1-15.2)          | 12.1 (10.3-15.1)                       | 0.11          |
| <b>Age &lt; 5 years, %</b>                  | <b>193</b> | <b>11.4</b>                | <b>0</b>                 | <b>2.6</b>                             | <b>0.02*</b>  |
| Sex, % male                                 | 193        | 13.9                       | 13.2                     | 11.8                                   | 0.93          |
| % puberty                                   | 284        | 67.5                       | 66.7                     | 81.1                                   | 0.12          |
| *Height SDS at diagnosis                    | 165        | 0.50 (-0.10-1.10)          | 0.40 (-0.45-1.15)        | 0.60 (0-1.40)                          | 0.59          |
| *Weight SDS at diagnosis                    | 166        | -0.40 (-0.90-0.10)         | -0.40 (-0.90-0.40)       | -0.20 (-0.90-0.20)                     | 0.79          |
| *BMI SDS at diagnosis                       | 165        | -0.80 (-1.20, -0.10)       | -0.75 (-1.15, -0.10)     | -0.70 (-1.00-0)                        | 0.73          |
| <b>Family history of thyroid disease, %</b> | <b>193</b> | <b>24.1</b>                | <b>42.1</b>              | <b>52.6</b>                            | <b>0.001*</b> |
| Other disease, %                            | 193        | 21.5                       | 10.5                     | 14.5                                   | 0.27          |
| Initial ATD dose (mg/kg/day)                | 191        | 0.41 (0.28-0.50)           | 0.35 (0.25-0.50)         | 0.36 (0.24-0.46)                       | 0.18          |
| Initial fT4 (ng/dL)                         | 169        | 4.23 (3.14-5.58)           | 4.11 (3.14-5.50)         | 4.40 (3.37-5.07)                       | 0.91          |
| <b>Initial TRAb, %</b>                      | <b>164</b> | <b>42.8 (29.2-72.8)</b>    | <b>53.6 (30.6-72.6)</b>  | <b>65.1 (47.2-77.7)</b>                | <b>0.02*</b>  |
| fT4 at end of ATD Tx                        | 113        | 1.37 (1.17-1.60)           | 1.39 (1.22-1.53)         | NA                                     | 0.88          |
| TRAb at end of ATD Tx                       | 103        | 7.13 (0.84-9.81)           | 6.57 (3.14-9.28)         | NA                                     | 0.40          |
| Time until fT4 became normal (months)       | 193        | 5.0 (2.2-8.7)              | 3.5 (1.9-4.7)            | 3.4 (1.9-6.9)                          | 0.13          |

|                                        |            |                         |                         |                        |               |
|----------------------------------------|------------|-------------------------|-------------------------|------------------------|---------------|
| Time until TRAb became normal (months) | 141        | 31.4 (17.0-60.5)        | 25.8(14.4-34.3)         | 24.2 (13.3-35.3)       | 0.05          |
| <b>Duration of ATD Rx (years)</b>      | <b>183</b> | <b>5.30 (2.90-8.60)</b> | <b>7.00 (5.60-8.20)</b> | <b>4.1 (2.40-6.00)</b> | <b>0.0001</b> |

---

156 Data were Median (25-75 percentile) in continuous variables or percentage in category variables

157 \*One-way ANNOVA; Other variables: Kruskal-Wallis Test

158            In the multivariate logistic regression model, we further identified patients who  
159   were aged < 5 years (Odds ratio [OR]: 12.6, 95% confidence interval [CI], 2.19-72.6;  
160    $P = 0.005$ ), had no family history of thyroid disease (OR: 3.75, 95% CI, 1.80-7.81;  $P$   
161   = 0.0004), and had a lower initial TRAb levels (OR: 0.98, 95% CI, 0.97-0.99;  $P =$   
162   0.01) as remission predictors in pediatric GD (Table 2).



**Table 2.** Factors associated with remission in child and adolescents with Graves disease, multiple logistic regression model

| Variable                                    | Univariate analysis      |              | Multivariate analysis   |               |
|---------------------------------------------|--------------------------|--------------|-------------------------|---------------|
|                                             | Odds ratio (95% CI)      | P value      | Odds ratio (95% CI)     | P value       |
| <b>Age &lt; 5 years</b>                     | <b>7.20 (1.51-34.3)</b>  | <b>0.01</b>  | <b>12.6 (2.19-72.6)</b> | <b>0.005</b>  |
| <b>No family history of thyroid disease</b> | <b>3.05 (1.62-5.74)</b>  | <b>0.001</b> | <b>3.75 (1.80-7.81)</b> | <b>0.0004</b> |
| <b>Initial TRAb, %</b>                      | <b>0.98 (0.97-0.997)</b> | <b>0.01</b>  | <b>0.98 (0.97-0.99)</b> | <b>0.01</b>   |

## 165 **Discussion**

166 In this study, we demonstrated that patients who aged < 5 years, who had no  
167 family history of thyroid disease and who had lower TRAb levels were more likely to  
168 achieve remission. There were 34% patients who were lost follow-up during the study  
169 period. Among patients who continued the ATD treatment, the long-term remission  
170 rate in pediatric GD patients was 39.9% after a median of 5.3 years of ATD treatment.

171 Our results suggested that GD patients who aged < 5 years had a higher chance  
172 to achieve remission and tended to receive ATD for a longer course. These young  
173 children were assumed to have better medical adherence under caregivers'  
174 surveillance. Previous studies reported that pre-pubertal children needed a longer  
175 medical treatment and had a lower remission rate than pubertal children [16]. Lazar et  
176 al. reported that the remission rate was not different between pre-pubertal children and  
177 adolescents, but the time to remission tended to be longer in pre-pubertal children [17].  
178 Two prospective studies showed that younger GD patients were less likely to achieve  
179 remission [8] or more likely to relapse after discontinuing ATD [7]. However, other  
180 retrospective studies performed in Japan [12] and Taiwan [18] did not determine age  
181 as a remission predictor. Because GD is rare in pre-pubertal children, especially in  
182 those aged < 5 years, further studies are needed to clarify the relationship between  
183 onset age and remission rate.

184 Our study showed that nearly 40% of pediatric GD patients had a family history  
185 of thyroid disease, consistent with previous studies in the literature [6, 7, 12, 19]. Our  
186 study also revealed that GD patients with a positive family history of thyroid disease  
187 were less likely to achieve remission. A similar study performed in 194 adult GD  
188 patients also proved that GD patients with a family history of thyroid disorders were

189 2.5 times more likely not to response to ATD treatment [20]. Although not all studies  
190 demonstrated a significant association between thyroid disease family history and the  
191 chance of remission [7, 8, 12, 21], our study still implied that family history acts as a  
192 remission indicator at the time of GD diagnosis.

193 Consistent with previous reports, our study also demonstrated that GD patients  
194 with lower titers of TRAb at diagnosis had a higher chance to remission [7, 21, 22].  
195 TRAb was reported to be well correlated with GD severity and extra-thyroidal  
196 manifestations [23], showing concomitancy with the clinical course and being  
197 valuable for the diagnosis and management of children with GD [24]. A retrospective  
198 study conducted in 115 children aged 3-15 years showed that a TRAb level  $\leq 2.5$   
199 times the upper reference limit, TRAb normalization during ATD and TRAb  
200 normalization time may predict further euthyroidism or hypothyroidism after ATD  
201 treatment stopped [21]. Pediatric GD patients with non-Caucasian origins, higher  
202 TRAb levels, higher free T4 levels, and younger age at diagnosis were reported to  
203 have a higher relapse rate [7]. These above studies, combined with our findings,  
204 confirmed TRAb as an indicator of GD activity and the predictive role for future  
205 remission occurrence after medical therapy.

206 Contradictory to adult GD cases, while a fixed course of ATD (no longer than 18  
207 months) was recommended [25, 26], most studies showed that a longer ATD  
208 treatment duration increased remission rates in pediatric GD [2, 6, 7]. Recent  
209 published guidelines therefore suggested a prolonged course of ATD therapy before  
210 proceeding to definite therapy [26, 27]. However, the median time to remission  
211 reported in the literature was highly variable, and the optimal duration of ATD has not  
212 yet been determined. Our treatment protocol resulted in 40% of remission which is  
213 consisted with previous studies [12, 28], after a median of 5.3 years of ATD treatment.

214 As shown in our study, long-term medical therapy resulted in high rates of lost follow  
215 up. Some clinicians believe that hypothyroidism is preferable to hyperthyroidism,  
216 because it is easier to treat and has a less serious morbidity [29]. However, medical  
217 adherence is problematic not only for long-term ATD therapy but also for the  
218 thyroxine supplement after hypothyroidism induced by definite therapy [30, 31].  
219 Further long-term, prospective studies are required to determine the optimal duration  
220 of ATD treatment for pediatric GD.

221 There were several limitations in our study. The first limitation came from its  
222 retrospective nature, and high rates of lost follow up, which highlighted the  
223 difficulties in the daily practice. Since pediatric GD patients need a protracted ATD  
224 course to attain remission, meticulous and realistic counseling of patients and families  
225 should be started from the time of diagnosis [31]. Second, we did not analyze the  
226 patients' characteristics who receiving radioactive iodine and total thyroidectomy,  
227 because few patients chose definite therapy in our institute, even in the relapse group.  
228 Third, the documentation of a family history of thyroid disease is not limited to  
229 autoimmune thyroid disease, which might introduce some bias to our estimate. Finally,  
230 the definition of remission is euthyroidism for only 12 months after ATD is  
231 discontinued. It is possible that patients experienced relapse one year after  
232 discontinuing medication. However, previous studies indicated that the risk of relapse  
233 declines with times [7, 12].

234 In conclusion, we identified pediatric GD patients who aged < 5 years, had no  
235 family history of thyroid disease and had lower TRAb levels were more likely to  
236 achieve remission. These remission predictors helped us to discuss with patients and  
237 families in the process of shared decision making and treatment plan. Long-term ATD  
238 is still a treatment option for pediatric GD, because our study showed that it resulted

239 in a remission rate of 40%, with a median of 5.3 years ATD course. Such a long-term  
240 treatment course was inevitably associated with a poor medical adherence, realistic  
241 discussion and consultation should be applied in every newly diagnosed pediatric GD  
242 patients.

243

#### 244 **Acknowledgments**

245 This study was supported by grants RD1050151 from Mackay Medical College; and  
246 MMH 108-119 and MMH E-108-7 from MacKay Memorial Hospital, Taipei,  
247 Taiwan.

## 248 **References**

- 249 1. Abraham-Nordling M, Bystrom K, Topping O, Lantz M, Berg G, Calissendorff J,  
250 et al. Incidence of hyperthyroidism in Sweden. *Eur J Endocrinol.*  
251 2011;165(6):899-905. doi: 10.1530/EJE-11-0548. PubMed PMID: 21908653.
- 252 2. Leger J, Kaguelidou F, Alberti C, Carel JC. Graves' disease in children. *Best Pract*  
253 *Res Clin Endocrinol Metab.* 2014;28(2):233-43. doi: 10.1016/j.beem.2013.08.008.  
254 PubMed PMID: 24629864.
- 255 3. Lavard L, Ranlov I, Perrild H, Andersen O, Jacobsen BB. Incidence of juvenile  
256 thyrotoxicosis in Denmark, 1982-1988. A nationwide study. *Eur J Endocrinol.*  
257 1994;130(6):565-8. PubMed PMID: 8205255.
- 258 4. DAVIES TF, LAURBERG P, BAHN RS. Hyperthyroid disorders. In: Melmed S,  
259 MBChB, MACP; , Polonsky KS, MD; , Larsen PR, MD, FRCP; , Kronenberg HM,  
260 MD, editors. *Williams Textbook of Endocrinology, Thirteenth Edition.*  
261 Philadelphia, PA 19103-2899: Elsevier; 2016. p. 369-415.
- 262 5. Kaguelidou F, Carel JC, Leger J. Graves' disease in childhood: advances in  
263 management with antithyroid drug therapy. *Horm Res.* 2009;71(6):310-7. doi:  
264 10.1159/000223414. PubMed PMID: 19506387.
- 265 6. Leger J, Gelwane G, Kaguelidou F, Benmerad M, Alberti C, French Childhood  
266 Graves' Disease Study G. Positive impact of long-term antithyroid drug treatment  
267 on the outcome of children with Graves' disease: national long-term cohort study.  
268 *J Clin Endocrinol Metab.* 2012;97(1):110-9. doi: 10.1210/jc.2011-1944. PubMed  
269 PMID: 22031519.
- 270 7. Kaguelidou F, Alberti C, Castanet M, Guitteny MA, Czernichow P, Leger J, et al.  
271 Predictors of autoimmune hyperthyroidism relapse in children after

- 272 discontinuation of antithyroid drug treatment. *J Clin Endocrinol Metab.*  
273 2008;93(10):3817-26. doi: 10.1210/jc.2008-0842. PubMed PMID: 18628515.
- 274 8. Glaser NS, Styne DM, Organization of Pediatric Endocrinologists of Northern  
275 California Collaborative Graves' Disease Study G. Predicting the likelihood of  
276 remission in children with Graves' disease: a prospective, multicenter study.  
277 *Pediatrics.* 2008;121(3):e481-8. doi: 10.1542/peds.2007-1535. PubMed PMID:  
278 18267979.
- 279 9. Rivkees SA. Pediatric Graves' disease: controversies in management. *Horm Res*  
280 *Paediatr.* 2010;74(5):305-11. doi: 10.1159/000320028. PubMed PMID: 20924158.
- 281 10. Weetman AP. Graves' hyperthyroidism: how long should antithyroid drug therapy  
282 be continued to achieve remission? *Nat Clin Pract Endocrinol Metab.*  
283 2006;2(1):2-3. doi: 10.1038/ncpendmet0068. PubMed PMID: 16932244.
- 284 11. Lippe BM, Landaw EM, Kaplan SA. Hyperthyroidism in children treated with  
285 long term medical therapy: twenty-five percent remission every two years. *J Clin*  
286 *Endocrinol Metab.* 1987;64(6):1241-5. doi: 10.1210/jcem-64-6-1241. PubMed  
287 PMID: 3571426.
- 288 12. Ohye H, Minagawa A, Noh JY, Mukasa K, Kunii Y, Watanabe N, et al.  
289 Antithyroid drug treatment for graves' disease in children: a long-term  
290 retrospective study at a single institution. *Thyroid.* 2014;24(2):200-7. doi:  
291 10.1089/thy.2012.0612. PubMed PMID: 23926918.
- 292 13. Jevalikar G, Solis J, Zacharin M. Long-term outcomes of pediatric Graves' disease.  
293 *J Pediatr Endocrinol Metab.* 2014;27(11-12):1131-6. doi:  
294 10.1515/jpem-2013-0342. PubMed PMID: 24945422.
- 295 14. Havgaard Kjaer R, Smedegard Andersen M, Hansen D. Increasing Incidence of  
296 Juvenile Thyrotoxicosis in Denmark: A Nationwide Study, 1998-2012. *Horm Res*

- 297 Paediatr. 2015;84(2):102-7. doi: 10.1159/000430985. PubMed PMID: 26111962.
- 298 15. Barlow AB, Wheatcroft N, Watson P, Weetman AP. Association of  
299 HLA-DQA1\*0501 with Graves' disease in English Caucasian men and women.  
300 Clin Endocrinol (Oxf). 1996;44(1):73-7. Epub 1996/01/01. PubMed PMID:  
301 8706297.
- 302 16. Shulman DI, Muhar I, Jorgensen EV, Diamond FB, Bercu BB, Root AW.  
303 Autoimmune hyperthyroidism in prepubertal children and adolescents:  
304 comparison of clinical and biochemical features at diagnosis and responses to  
305 medical therapy. Thyroid. 1997;7(5):755-60. doi: 10.1089/thy.1997.7.755.  
306 PubMed PMID: 9349579.
- 307 17. Lazar L, Kalter-Leibovici O, Pertzalan A, Weintrob N, Josefsberg Z, Phillip M.  
308 Thyrotoxicosis in prepubertal children compared with pubertal and postpubertal  
309 patients. J Clin Endocrinol Metab. 2000;85(10):3678-82. doi:  
310 10.1210/jcem.85.10.6922. PubMed PMID: 11061522.
- 311 18. Leu SW, Chi CS, Shu SG. Outcome of antithyroid medication and radioiodine  
312 therapy in pediatric Graves' disease. Acta Paediatr Taiwan. 2003;44(4):220-6.  
313 PubMed PMID: 14674226.
- 314 19. Manji N, Carr-Smith JD, Boelaert K, Allahabadia A, Armitage M, Chatterjee VK,  
315 et al. Influences of age, gender, smoking, and family history on autoimmune  
316 thyroid disease phenotype. J Clin Endocrinol Metab. 2006;91(12):4873-80. doi:  
317 10.1210/jc.2006-1402. PubMed PMID: 16968788.
- 318 20. Dauksiene D, Dauksa A, Mickuviene N. Independent pretreatment predictors of  
319 Graves' disease outcome. Medicina (Kaunas). 2013;49(10):427-34. PubMed  
320 PMID: 24709784.
- 321 21. Gastaldi R, Poggi E, Mussa A, Weber G, Vigone MC, Salerno M, et al. Graves



- 322 disease in children: thyroid-stimulating hormone receptor antibodies as remission  
323 markers. *J Pediatr.* 2014;164(5):1189-94 e1. doi: 10.1016/j.jpeds.2013.12.047.  
324 PubMed PMID: 24518168.
- 325 22. Vitti P, Rago T, Chiovato L, Pallini S, Santini F, Fiore E, et al. Clinical features of  
326 patients with Graves' disease undergoing remission after antithyroid drug  
327 treatment. *Thyroid.* 1997;7(3):369-75. doi: 10.1089/thy.1997.7.369. PubMed  
328 PMID: 9226205.
- 329 23. Diana T, Brown RS, Bossowski A, Segni M, Niedziela M, Konig J, et al. Clinical  
330 relevance of thyroid-stimulating autoantibodies in pediatric graves' disease-a  
331 multicenter study. *J Clin Endocrinol Metab.* 2014;99(5):1648-55. doi:  
332 10.1210/jc.2013-4026. PubMed PMID: 24517152.
- 333 24. Shibayama K, Ohyama Y, Yokota Y, Ohtsu S, Takubo N, Matsuura N. Assays for  
334 thyroid-stimulating antibodies and thyrotropin-binding inhibitory  
335 immunoglobulins in children with Graves' disease. *Endocr J.* 2005;52(5):505-10.  
336 PubMed PMID: 16284425.
- 337 25. Abraham P, Avenell A, Park CM, Watson WA, Bevan JS. A systematic review of  
338 drug therapy for Graves' hyperthyroidism. *Eur J Endocrinol.* 2005;153(4):489-98.  
339 doi: 10.1530/eje.1.01993. PubMed PMID: 16189168.
- 340 26. Ross DS, Burch HB, Cooper DS, Greenlee MC, Laurberg P, Maia AL, et al. 2016  
341 American Thyroid Association Guidelines for Diagnosis and Management of  
342 Hyperthyroidism and Other Causes of Thyrotoxicosis. *Thyroid.*  
343 2016;26(10):1343-421. doi: 10.1089/thy.2016.0229. PubMed PMID: 27521067.
- 344 27. Committee on Pharmaceutical Affairs JSfPE, the Pediatric Thyroid Disease  
345 Committee JTA, Minamitani K, Sato H, Ohye H, Harada S, et al. Guidelines for  
346 the treatment of childhood-onset Graves' disease in Japan, 2016. *Clin Pediatr*

- 347 Endocrinol. 2017;26(2):29-62. doi: 10.1297/cpe.26.29. PubMed PMID: 28458457;  
348 PubMed Central PMCID: PMC5402306.
- 349 28. Azizi F, Amouzegar A. Management of thyrotoxicosis in children and adolescents:  
350 35 years' experience in 304 patients. J Pediatr Endocrinol Metab.  
351 2018;31(2):159-65. doi: 10.1515/jpem-2017-0394. PubMed PMID: 29306930.
- 352 29. Leger J, Carel JC. Hyperthyroidism in childhood: causes, when and how to treat. J  
353 Clin Res Pediatr Endocrinol. 2013;5 Suppl 1:50-6. doi: 10.4274/jcrpe.854.  
354 PubMed PMID: 23154161; PubMed Central PMCID: PMC5402306.
- 355 30. Kourime M, McGowan S, Al Towati M, Ahmed SF, Stewart G, Williamson S, et  
356 al. Long-term outcome of thyrotoxicosis in childhood and adolescence in the west  
357 of Scotland: the case for long-term antithyroid treatment and the importance of  
358 initial counselling. Arch Dis Child. 2018;103(7):637-42. doi:  
359 10.1136/archdischild-2017-313454. PubMed PMID: 29269558; PubMed Central  
360 PMCID: PMC6047164.
- 361 31. Cheetham T, Lane L. Graves' disease. Time to move on. Arch Dis Child. 2018.  
362 doi: 10.1136/archdischild-2017-314486. PubMed PMID: 29348117

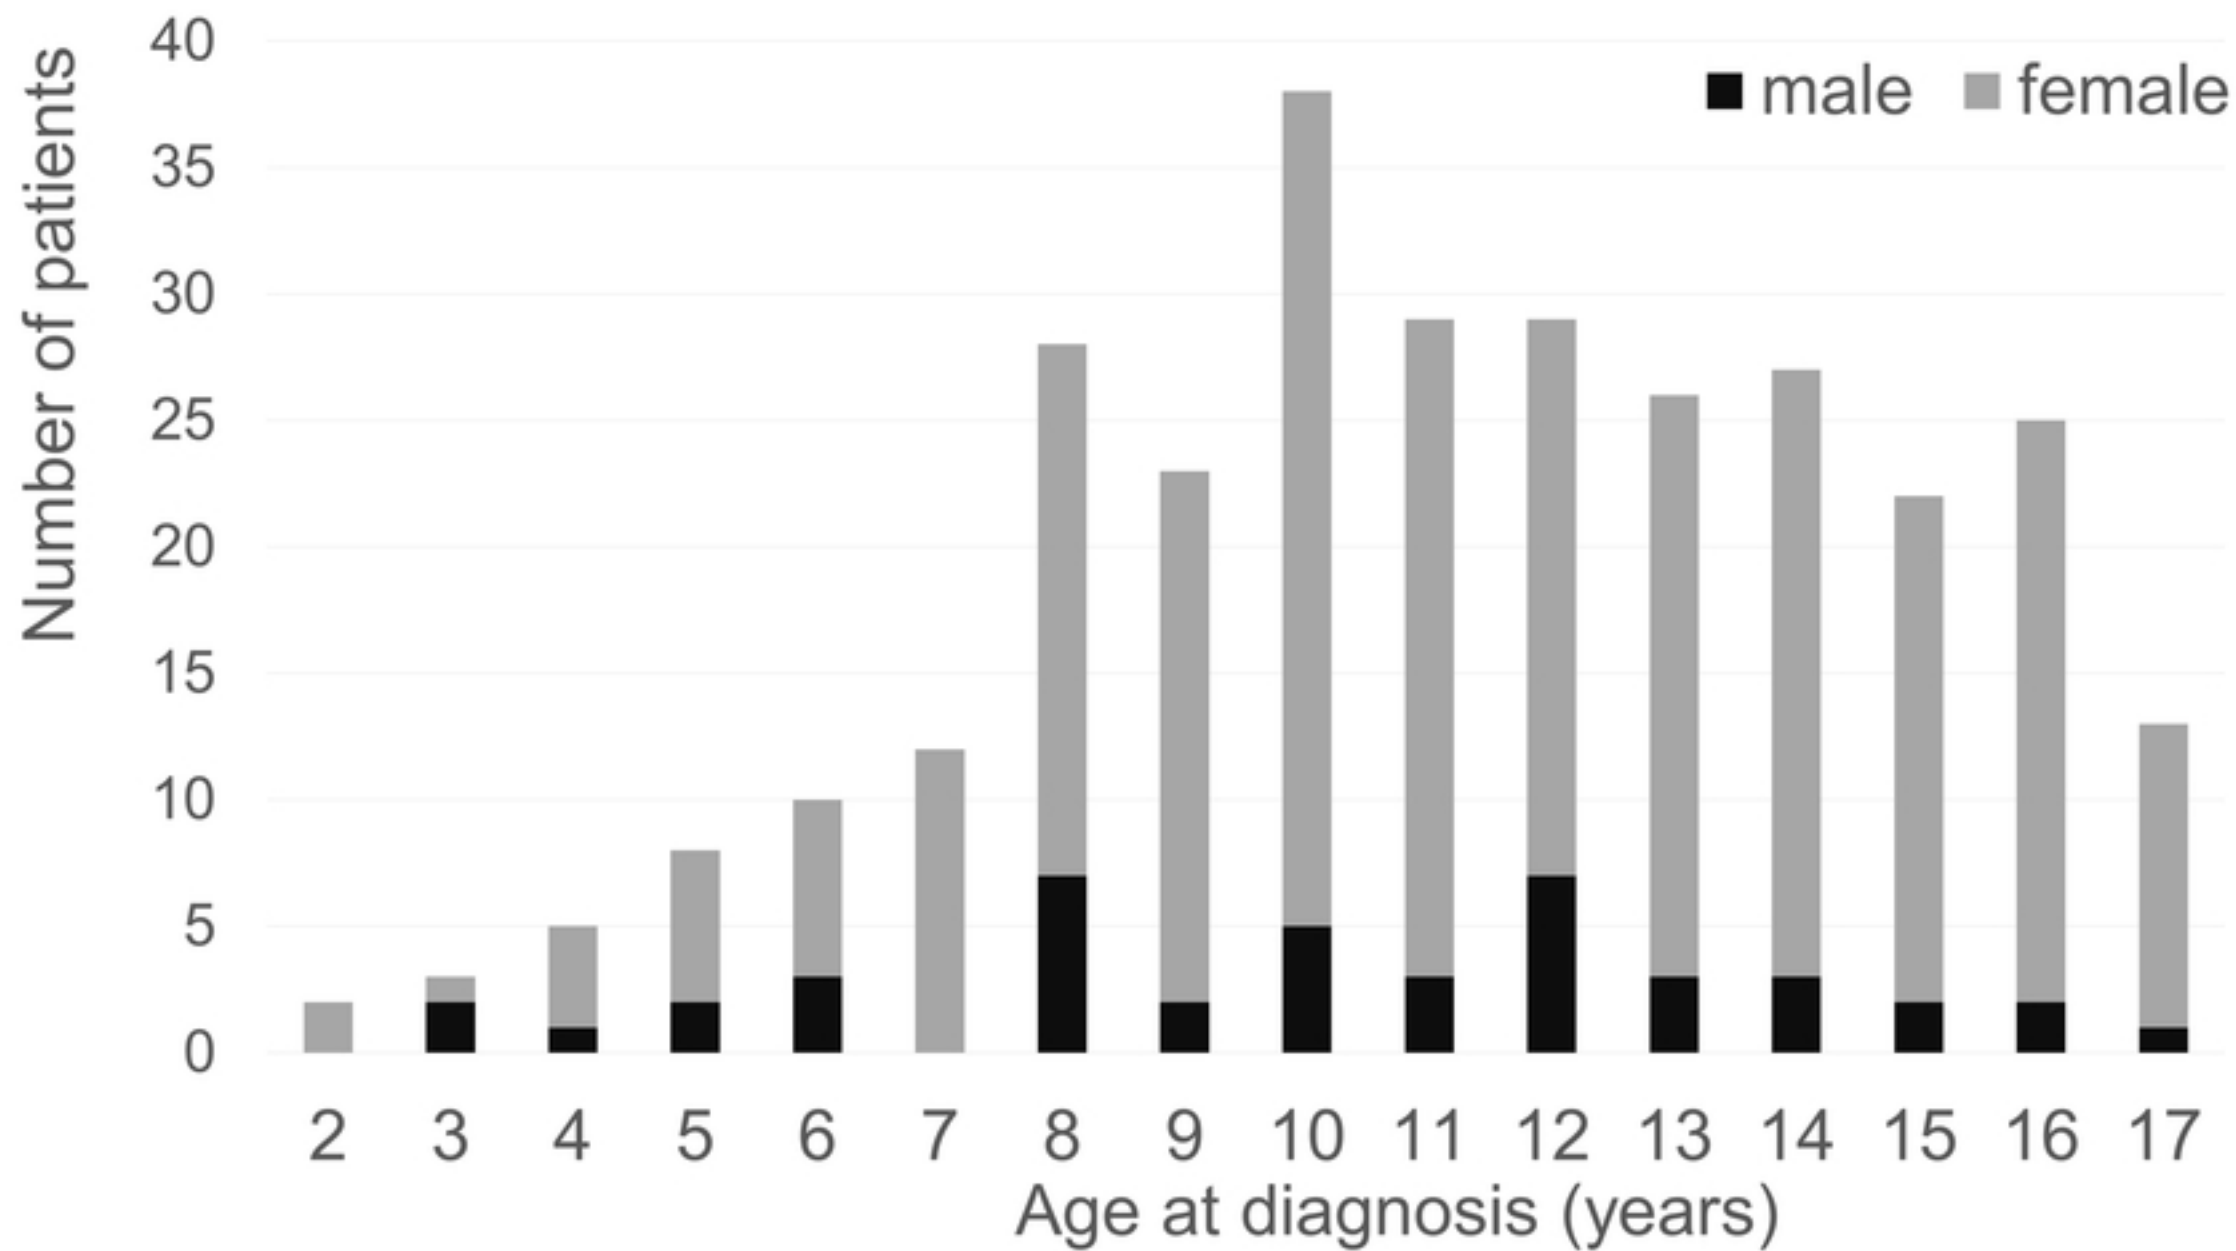

Fig1

bioRxiv preprint doi: <https://doi.org/10.1101/618942>; this version posted April 25, 2019. The copyright holder for this preprint (which was not certified by peer review) is the author/funder, who has granted bioRxiv a license to display the preprint in perpetuity. It is made available under aCC-BY 4.0 International license.

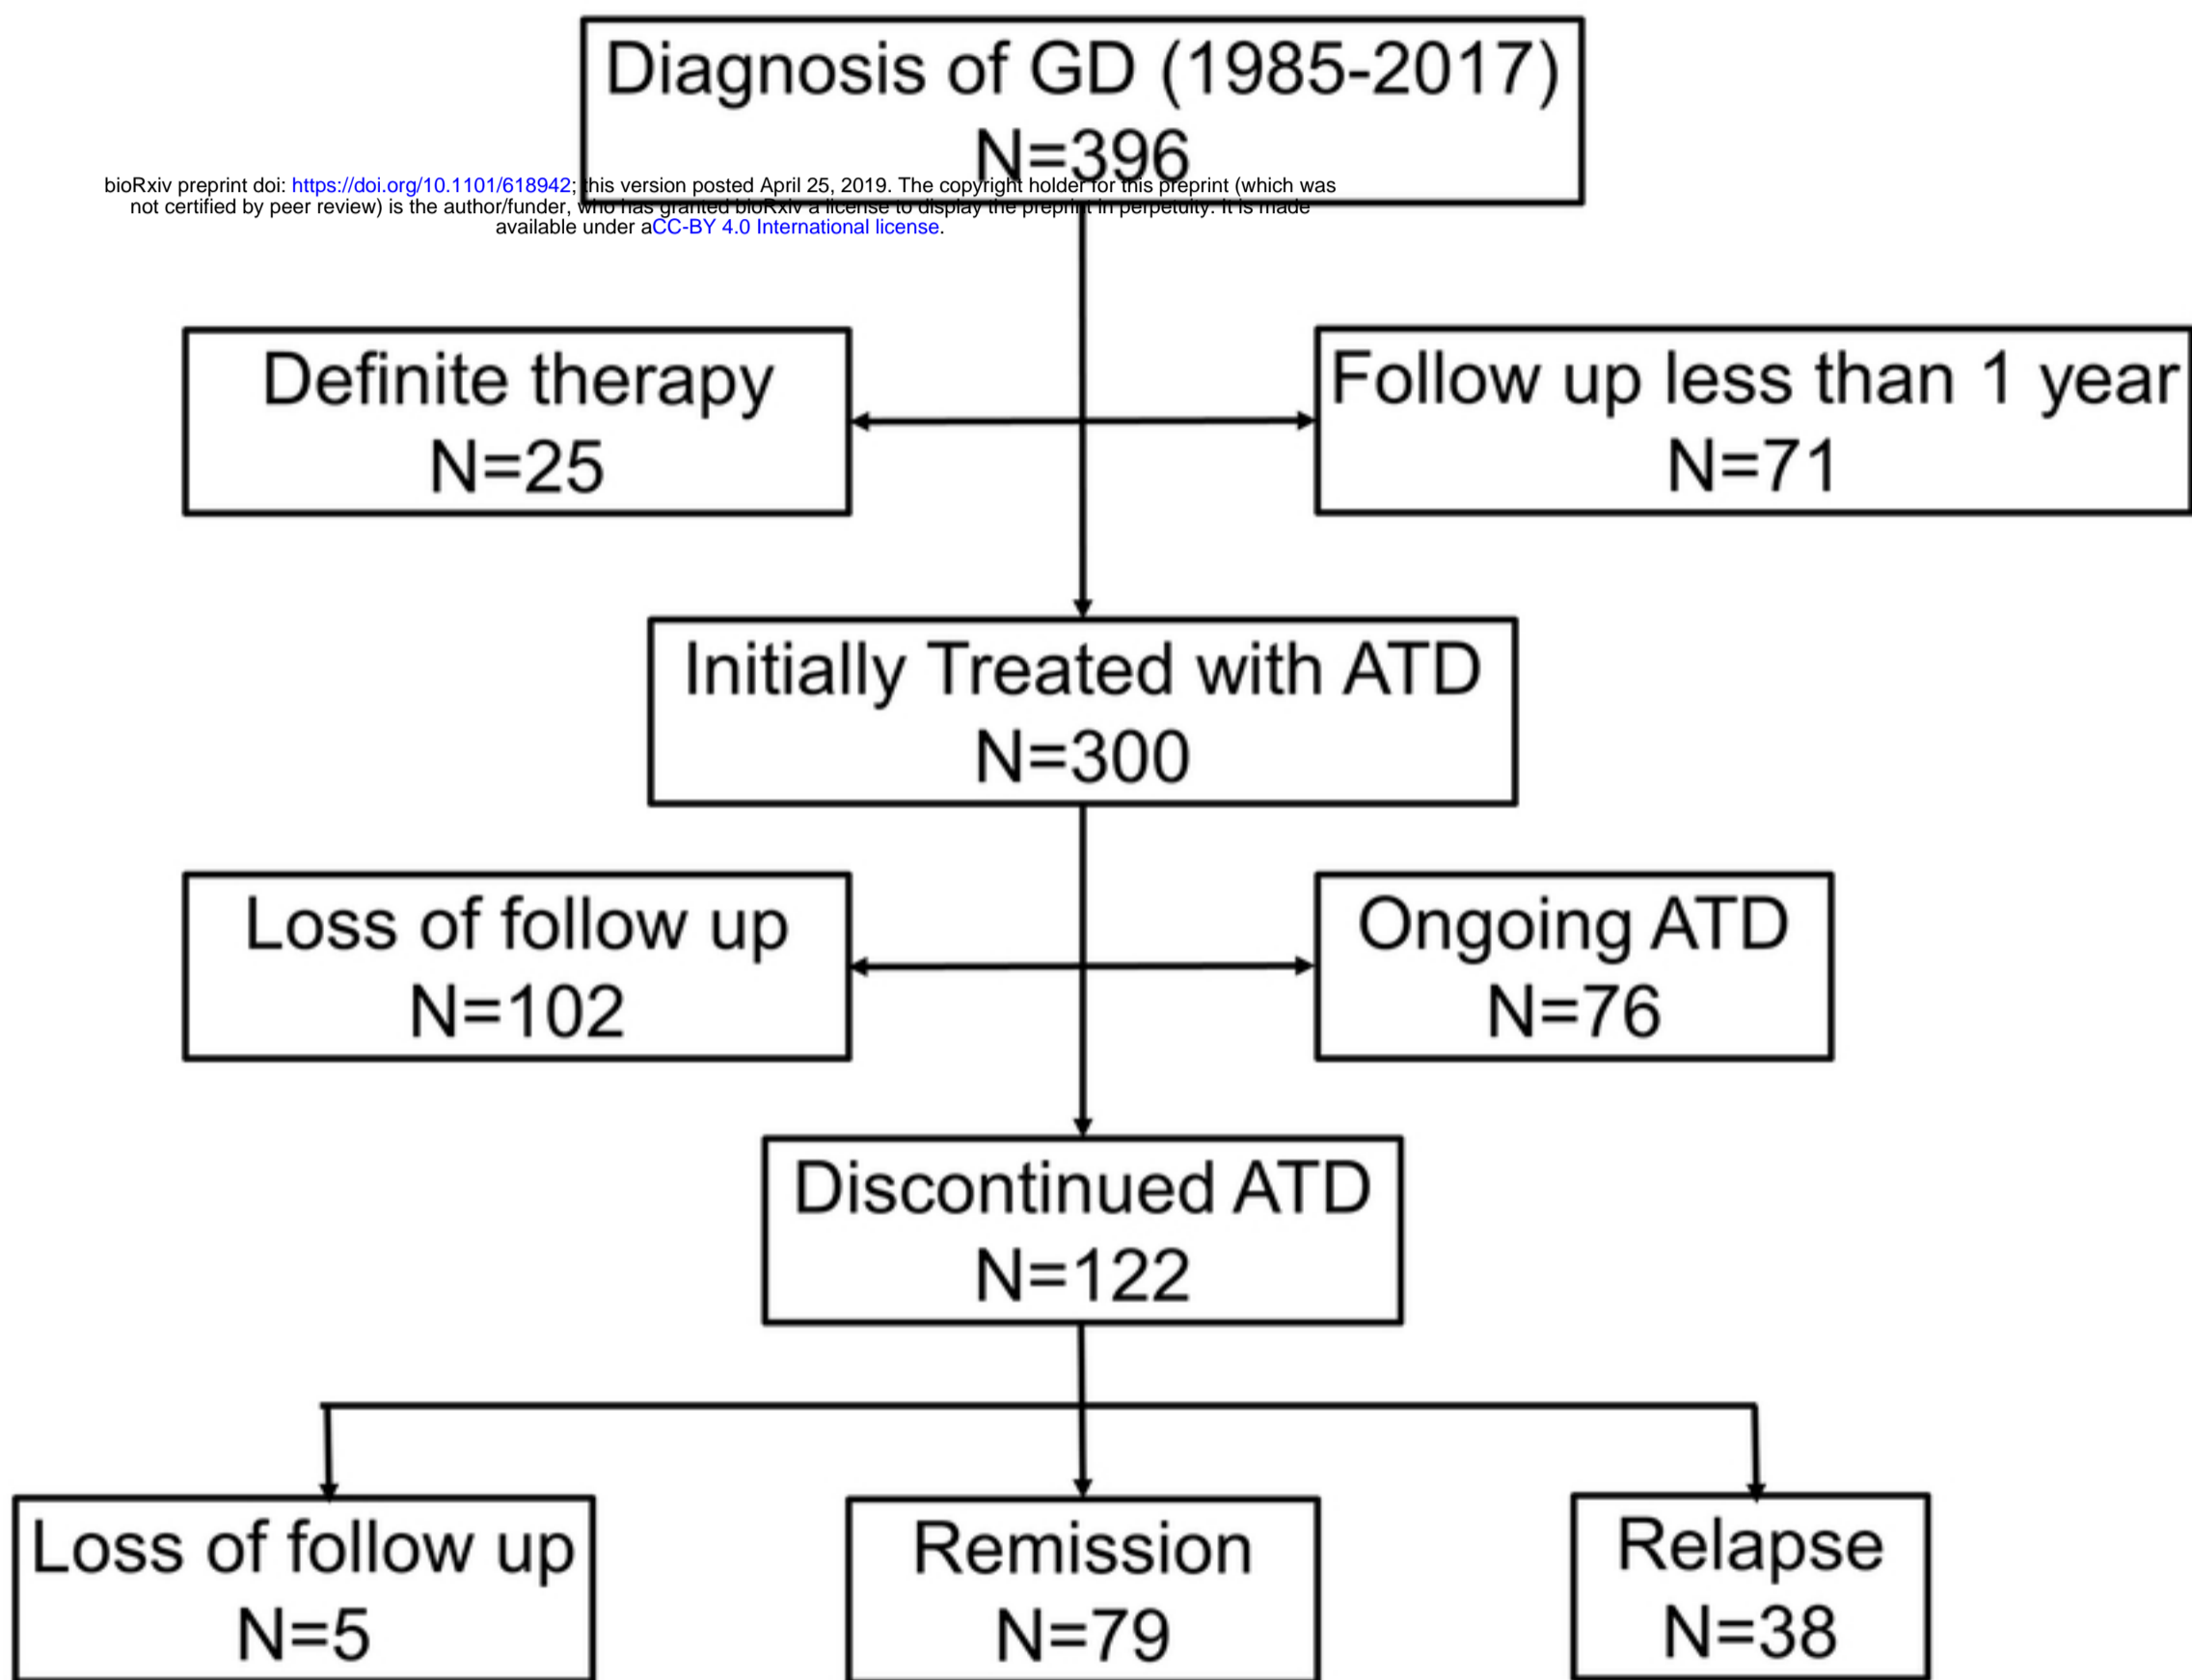

Fig2
